# Supplementary material for: Simulation of Winter Deep Slope Convection in Peter the Great Bay (Japan Sea)
Source: MDPI journal article supplement (doi:10.3390/fluids7040134), 2022-04-12
Supplement: s1 [file s1]

Archive with 1 entries (1 files):
- fluids-1647518-supplementary.pdf
